# Supplementary material for: Retinoic Acid Mediates Regulation of Network Formation by COUP-TFII and VE-Cadherin Expression by TGFβ Receptor Kinase in Breast Cancer Cells
Source: PLoS One. 2010 Apr 6;5(4):e10023. doi: 10.1371/journal.pone.0010023 (PMC2850308; doi:10.1371/journal.pone.0010023)
Supplement: Table S1 — Tumor Morphology Genes Regulated by RA. (0.03 MB XLS) [file pone.0010023.s001.xls]

## Sheet: Table S1 - Tumor Morph Genes RA
Table S1 - Tumor Morphology Genes Regulated by RA
Gene Symbol	Description	Fold Change (RA/Control)
AURKA	aurora kinase A	-2.3
BDKRB2	bradykinin receptor B2	5
BIRC5	baculoviral IAP repeat-containing 5 (survivin)	-2
BRCA1	breast cancer 1, early onset	-1.9
BUB1	BUB1 budding uninhibited by benzimidazoles 1 homolog (yeast)	-1.6
CASP1	caspase 1, apoptosis-related cysteine peptidase (interleukin 1, beta, convertase)	1.66667
CAV1	caveolin 1, caveolae protein, 22kDa	2.5
CCL2	chemokine (C-C motif) ligand 2	2
CCNA1	cyclin A1	-2
CCND1	cyclin D1	2
CD44	CD44 molecule (Indian blood group)	3.33333
CD47	CD47 molecule	1.66667
CDC25B	cell division cycle 25 homolog B (S. pombe)	-2.5
CDK2	cyclin-dependent kinase 2	-1.6
CDKN2B	cyclin-dependent kinase inhibitor 2B (p15, inhibits CDK4)	2.5
CGA	glycoprotein hormones, alpha polypeptide	2.5
CHEK2	CHK2 checkpoint homolog (S. pombe)	-1.8
CST3	cystatin C (amyloid angiopathy and cerebral hemorrhage)	1.66667
CTSS	cathepsin S	5
DAPK1	death-associated protein kinase 1	-1.7
DNMT1	DNA (cytosine-5-)-methyltransferase 1	-1.9
EGF	epidermal growth factor (beta-urogastrone)	1.66667
EGFR	epidermal growth factor receptor	2.5
ENG	endoglin (Osler-Rendu-Weber syndrome 1)	1.42857
ERBB3	v-erb-b2 erythroblastic leukemia viral oncogene homolog 3 (avian)	1.42857
ESR1	estrogen receptor 1	2
FGF1	fibroblast growth factor 1 (acidic)	3.33333
FOS	v-fos FBJ murine osteosarcoma viral oncogene homolog	-3.5
FOXM1	forkhead box M1	-2.6
GPX2	glutathione peroxidase 2 (gastrointestinal)	2
HIP1	huntingtin interacting protein 1	-2
HMMR	hyaluronan-mediated motility receptor (RHAMM)	-2.8
ID1	inhibitor of DNA binding 1, dominant negative helix-loop-helix protein	3.33333
ID2	inhibitor of DNA binding 2, dominant negative helix-loop-helix protein	-2.5
IGFBP2	insulin-like growth factor binding protein 2, 36kDa	-1.6
IL12A	interleukin 12A	-1.8
INHA	inhibin, alpha	2
IRF1	interferon regulatory factor 1	2.5
ITGB6	integrin, beta 6	2.5
KIF11	kinesin family member 11	-2.9
LOXL2	lysyl oxidase-like 2	2
MCL1	myeloid cell leukemia sequence 1 (BCL2-related)	2.5
MET	met proto-oncogene (hepatocyte growth factor receptor)	-2.3
NDRG1	N-myc downstream regulated gene 1	-1.9
NRP1	neuropilin 1	2.5
ODC1	ornithine decarboxylase 1	-2.4
OLR1	oxidized low density lipoprotein (lectin-like) receptor 1	2.5
PBX1	pre-B-cell leukemia homeobox 1	2
PDGFD	platelet derived growth factor D	3.33333
PEG10	paternally expressed 10	-2.6
PLAU	plasminogen activator, urokinase	3.33333
PLCE1	phospholipase C, epsilon 1	-1.5
PLK1	polo-like kinase 1 (Drosophila)	-2.2
PTGES	prostaglandin E synthase	3.33333
SAT1	spermidine/spermine N1-acetyltransferase 1	1.66667
SERPINE1	serpin peptidase inhibitor, (plasminogen activator inhibitor type 1), member 1	2
SLC25A1	solute carrier family 25 (mitochondrial carrier; citrate transporter), member 1	-1.5
SMAD3	SMAD family member 3	2.5
STAT3	signal transducer and activator of transcription 3 (acute-phase response factor)	2
TIMP2	TIMP metallopeptidase inhibitor 2	2.5
TNFSF10	tumor necrosis factor (ligand) superfamily, member 10	3.33333
TNS1	tensin 1	-1.4
TPR	translocated promoter region (to activated MET oncogene)	2.5
