# Supplementary material for: Retinoic Acid Mediates Regulation of Network Formation by COUP-TFII and VE-Cadherin Expression by TGFβ Receptor Kinase in Breast Cancer Cells
Source: PLoS One. 2010 Apr 6;5(4):e10023. doi: 10.1371/journal.pone.0010023 (PMC2850308; doi:10.1371/journal.pone.0010023)
Supplement: Table S3 — Hematological Function and Development Genes + Coagulation Cascade Genes Regulated by RA. (0.02 MB XLS) [file pone.0010023.s003.xls]

## Sheet: Table S3 - Heme Coag RA
Table S3 - Hematological Function and Development Genes + Coagulation Cascade Genes Regulated by RA
Name	Description	Fold Change (RA/Control)
BDKRB1	bradykinin receptor B1	2
BDKRB2	bradykinin receptor B2	5
F12	coagulation factor XII (Hageman factor)	-1.5
FGB	fibrinogen beta chain	2.5
PLAU	plasminogen activator, urokinase	3.333
SERPINE1	serpin peptidase inhibitor, (plasminogen activator inhibitor type 1)	2
ADORA2A	adenosine A2a receptor	1.66667
BHLHB2	basic helix-loop-helix domain containing, class B, 2	2
CFLAR	CASP8 and FADD-like apoptosis regulator	2
CP	ceruloplasmin (ferroxidase)	5
CSRP2	cysteine and glycine-rich protein 2	-2.3
FUT4	fucosyltransferase 4	-1.5
FXYD5	FXYD domain containing ion transport regulator 5	1.42857
FZD1	frizzled homolog 1 (Drosophila)	-1.8
HMGCS1	3-hydroxy-3-methylglutaryl-Coenzyme A synthase 1 (soluble)	1.42857
HMOX1	heme oxygenase (decycling) 1	1.66667
ITGB6	integrin, beta 6	2.5
MAT2A	methionine adenosyltransferase II, alpha	1.66667
OLR1	oxidized low density lipoprotein (lectin-like) receptor 1	2.5
PCGF2	polycomb group ring finger 2	-1.6
PCYT1A	phosphate cytidylyltransferase 1, choline, alpha	1.42857
PDLIM7	PDZ and LIM domain 7 (enigma)	1.66667
RYBP	RING1 and YY1 binding protein	1.66667
SELE	selectin E (endothelial adhesion molecule 1)	5
SELL	selectin L (lymphocyte adhesion molecule 1)	5
SLC29A1	solute carrier family 29 (nucleoside transporters), member 1	-1.7
SLC6A6	solute carrier family 6 (neurotransmitter transporter, taurine), member 6	2.5
SNAP23	synaptosomal-associated protein, 23kDa	1.66667
SSX2IP	synovial sarcoma, X breakpoint 2 interacting protein	-1.5
STOM	stomatin	-2.1
TRIOBP	TRIO and F-actin binding protein	2
WNT5A	wingless-type MMTV integration site family, member 5A	1.42857
